# Supplementary material for: Einsatz von künstlicher Intelligenz im Screening auf diabetische Retinopathie an einer diabetologischen Schwerpunktklinik
Source: Springer Nature journal article supplement (doi:10.1007/s00347-021-01556-5), 2022-01-26
Supplement: MOESM1 [file 20069656]

## IDx-DR-Analysebericht

Patienten-ID:

IDx-Übermittlungs-ID:

Datum der Testanalyse:

Uhrzeit der Testanalyse:

Testergebnis: **Negativ**

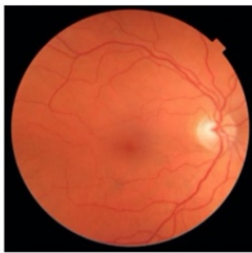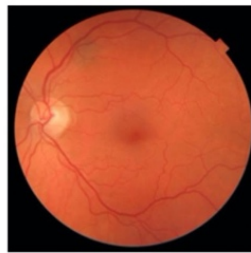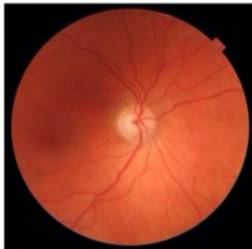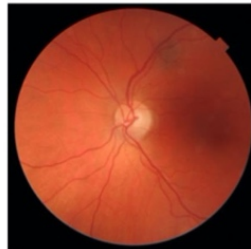

**Warnung:** Die obigen Bilder haben eine geringere Auflösung und sind komprimierte Versionen des von IDx-DR Client verwendeten Originalbildes. Diese Bilder NICHT für Diagnosezwecke verwenden.

DR-EU\_2.2\_AS\_2.2.1
