# Supplementary figures and images for: Einsatz von künstlicher Intelligenz im Screening auf diabetische Retinopathie an einer diabetologischen Schwerpunktklinik
Source: Springer Nature journal article supplement (doi:10.1007/s00347-021-01556-5), 2022-01-26

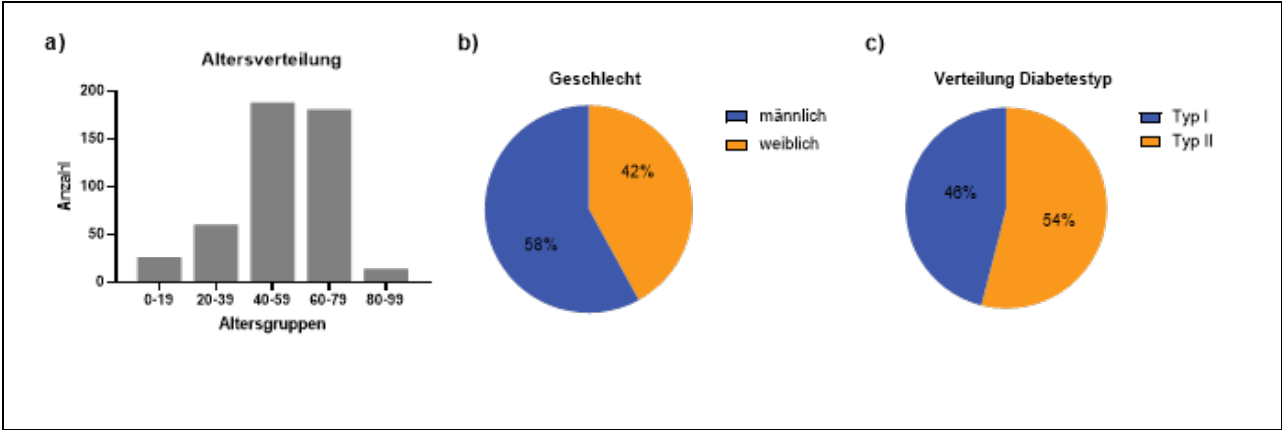

Suppl. Abb. 2: (a) Altersverteilung; (b) Geschlechterverteilung; (c) Diabetes mellitus-Typ

Supplement: MOESM2 [file 20069656]
